# Supplementary material
Source: PubMed Central journal article supplement (PMC4330749)
Supplement: pnas.1417415112.sapp.pdf [file pnas.1417415112.sapp.pdf]

# Supporting Information for

## **Quinary structure modulates protein stability in cells**

William B. Monteith<sup>a</sup>, Rachel D. Cohen<sup>a</sup>, Austin E. Smith<sup>a</sup>, Emilio Guzman-Cisneros<sup>a</sup>,  
and Gary J. Pielak<sup>a,b,c,1</sup>

<sup>a</sup>Department of Chemistry, <sup>b</sup>Department of Biochemistry and Biophysics, <sup>c</sup>Lineberger  
Comprehensive Cancer Center, University of North Carolina, Chapel Hill, NC, USA  
27599

<sup>1</sup>To whom correspondence may be addressed. E-mail: gary\_pielak@unc.edu.

Author contributions: W.B.M., A.E.S., R.D.C and G.J.P. designed research; W.B.M.,  
R.D.C., A.E.S. and E. G.-C. performed research; W.B.M., A.E.S., R.D.C. and G.J.P.  
wrote the paper.

**Table S1.** Backbone amide proton exchange rates ( $k_{\text{obs}}$ ,  $\text{s}^{-1}$ ) and corresponding  $\Delta G_{\text{op}}^{\circ}$  (kcal/mol) values for wild type (T2Q) GB1 in buffer (20 mM citrate, 150 mM NaCl, pH 5.8, 37 °C). The in-cell data have been published (1). <sup>a</sup>SDM: standard deviation of the mean from three trials. pH is corrected for the isotope effect. For glass electrodes in D<sub>2</sub>O, pH = pH<sub>read</sub> + 0.4 (2).

| <b>residue</b> | <b><math>k_{\text{Obs,buff}}</math></b> | <b>SDM<sup>a</sup></b> | <b><math>\Delta G_{\text{op,buff}}^{\circ}</math></b> | <b>SDM<sup>a</sup></b> |
|----------------|-----------------------------------------|------------------------|-------------------------------------------------------|------------------------|
| Y3             | 3.88E-05                                | 4.92E-06               | 6.31                                                  | 0.10                   |
| K4             | 4.87E-05                                | 9.70E-06               | 6.46                                                  | 0.02                   |
| V26            | 2.18E-05                                | 2.22E-06               | 7.04                                                  | 0.12                   |
| K28            | 4.97E-05                                | 6.37E-06               | 5.97                                                  | 0.04                   |
| V29            | 1.84E-05                                | 3.78E-06               | 6.00                                                  | 0.04                   |
| K31            | 1.32E-05                                | 3.10E-06               | 7.17                                                  | 0.09                   |
| A34            | 2.23E-05                                | 2.55E-06               | 6.77                                                  | 0.05                   |
| T44            | 1.34E-05                                | 1.02E-06               | 6.89                                                  | 0.06                   |
| D46            | 1.37E-05                                | 2.74E-06               | 6.74                                                  | 0.02                   |
| T51            | 2.79E-05                                | 1.99E-06               | 6.64                                                  | 0.10                   |
| F52            | 1.80E-05                                | 5.34E-06               | 6.72                                                  | 0.13                   |
| T53            | 2.54E-05                                | 4.99E-06               | 6.73                                                  | 0.14                   |

**Table S2.** Backbone amide proton exchange rates ( $k_{\text{obs}}$ ,  $\text{s}^{-1}$ ) and corresponding  $\Delta G_{\text{op}}^{\circ}$  (kcal/mol) values for D40K GB1 in cells and in buffer (20 mM citrate, 150 mM NaCl pH 5.8, 37 °C). pH is corrected for the isotope effect. For glass electrodes in  $\text{D}_2\text{O}$ ,  $\text{pH} = \text{pH}_{\text{read}} + 0.4$  (2). <sup>a</sup>SDM: standard deviation of the mean from three trials. <sup>b</sup> $\Delta\Delta G_{\text{op,cell,D40K}}^{\circ} = \Delta G_{\text{op,cell,D40K}}^{\circ} - \Delta G_{\text{op,buff,D40K}}^{\circ}$ . <sup>c</sup>From propagation of error,  $\sigma =$

$$\sqrt{(\delta_{\Delta G_{\text{op,cell}}^{\circ}})^2 + (\delta_{\Delta G_{\text{op,buff}}^{\circ}})^2}.$$

| residue | $k_{\text{obs,cells}}$ | SDM <sup>a</sup> | $k_{\text{obs,buff}}$ | SDM <sup>a</sup> |
|---------|------------------------|------------------|-----------------------|------------------|
| Y3      | 9.73E-04               | ±4.46E-05        | 1.80E-05              | ±1.52E-06        |
| A26     | 9.45E-04               | ±5.48E-05        | 9.43E-06              | ±2.27E-06        |
| K28     | 9.73E-04               | ±4.74E-05        | 3.41E-05              | ±1.48E-06        |
| V29     | 6.30E-04               | ±4.87E-05        | 1.61E-05              | ±1.62E-06        |
| K31     | 9.28E-04               | ±1.92E-05        | 1.16E-05              | ±1.95E-06        |
| A34     | 7.17E-04               | ±8.10E-05        | 1.06E-05              | ±1.88E-06        |
| T44     | 6.77E-04               | ±7.96E-06        | 9.54E-06              | ±3.14E-06        |
| D46     | 6.84E-04               | ±5.68E-05        | 1.07E-05              | ±2.45E-06        |
| T51     | 9.59E-04               | ±1.79E-05        | 1.35E-05              | ±2.79E-06        |
| F52     | 8.60E-04               | ±1.09E-04        | 1.02E-05              | ±2.59E-06        |
| T53     | 9.42E-04               | ±3.27E-05        | 1.08E-05              | ±2.24E-06        |

| residue | $\Delta G_{\text{op,cell,D40K}}^{\circ}$ | SDM <sup>a</sup> | $\Delta G_{\text{op,buff,D40K}}^{\circ}$ | SDM <sup>a</sup> | $\Delta\Delta G_{\text{op,cell,D40K}}^{\circ}$ <sup>b</sup> | uncertainty <sup>c</sup> |
|---------|------------------------------------------|------------------|------------------------------------------|------------------|-------------------------------------------------------------|--------------------------|
| Y3      | 4.20                                     | ±0.03            | 6.59                                     | ±0.02            | -2.39                                                       | ±0.03                    |
| A26     | 4.60                                     | ±0.04            | 7.43                                     | ±0.11            | -2.82                                                       | ±0.12                    |
| K28     | 4.07                                     | ±0.03            | 6.07                                     | ±0.02            | -2.00                                                       | ±0.03                    |
| V29     | 3.75                                     | ±0.05            | 5.94                                     | ±0.02            | -2.19                                                       | ±0.05                    |
| K31     | 4.36                                     | ±0.01            | 7.02                                     | ±0.07            | -2.65                                                       | ±0.07                    |
| A34     | 4.57                                     | ±0.07            | 7.11                                     | ±0.07            | -2.55                                                       | ±0.10                    |
| T44     | 4.27                                     | ±0.01            | 6.94                                     | ±0.18            | -2.67                                                       | ±0.18                    |
| D46     | 4.23                                     | ±0.05            | 6.78                                     | ±0.11            | -2.55                                                       | ±0.12                    |
| T51     | 4.38                                     | ±0.01            | 6.97                                     | ±0.08            | -2.59                                                       | ±0.08                    |
| F52     | 4.33                                     | ±0.08            | 7.04                                     | ±0.12            | -2.71                                                       | ±0.14                    |
| T53     | 4.31                                     | ±0.02            | 7.03                                     | ±0.09            | -2.72                                                       | ±0.09                    |

**Table S3.**  $\Delta\Delta G_{\text{op,mut}}^{\circ}$  ( $\Delta G_{\text{op,D40K}}^{\circ} - \Delta G_{\text{op,wt}}^{\circ}$ , kcal/mol) caused by the D40K mutation in cells and in buffer (20 mM citrate, pH 5.8, 37 °C). pH is corrected for the isotope effect. For glass electrodes in D<sub>2</sub>O, pH = pH<sub>read</sub> + 0.4 (2). <sup>a</sup>From propagation of error.

| <b>residue</b> | $\Delta\Delta G_{\text{op,mut}}^{\circ}$ | <b>uncertainty<sup>a</sup></b> | $\Delta\Delta G_{\text{op,mut}}^{\circ}$ | <b>uncertainty<sup>a</sup></b> |
|----------------|------------------------------------------|--------------------------------|------------------------------------------|--------------------------------|
| Y3             | -1.18                                    | ±0.04                          | 0.34                                     | ±0.10                          |
| A26            | -1.41                                    | ±0.06                          | 0.44                                     | ±0.16                          |
| K28            | -1.08                                    | ±0.05                          | 0.09                                     | ±0.04                          |
| V29            | -1.35                                    | ±0.05                          | -0.09                                    | ±0.04                          |
| K31            | -1.37                                    | ±0.07                          | -0.06                                    | ±0.11                          |
| A34            | -1.29                                    | ±0.08                          | 0.34                                     | ±0.09                          |
| T44            | -1.63                                    | ±0.07                          | -0.03                                    | ±0.19                          |
| D46            | -1.49                                    | ±0.12                          | 0.04                                     | ±0.11                          |
| T51            | -1.23                                    | ±0.06                          | 0.35                                     | ±0.13                          |
| F52            | -1.50                                    | ±0.11                          | 0.20                                     | ±0.17                          |
| T53            | -1.22                                    | ±0.07                          | 0.42                                     | ±0.16                          |

**Table S4.** Backbone amide proton exchange rates ( $k_{obs}$ ,  $s^{-1}$ ) and corresponding  $\Delta G_{op}^{\ddagger}$  ( $kcal/mol$ ) values for I6L GB1 in buffer (20 mM citrate, 150 mM NaCl pH 5.8, 37 °C). The in-cell data have been published (1). pH is corrected for the isotope effect. For glass electrodes in  $D_2O$ ,  $pH = pH_{read} + 0.4$  (2). <sup>a</sup>The  $k_{obs}$  values are the average of two trials. <sup>b</sup>The uncertainty is the range. <sup>c</sup>From propagation of error.

| <b>residue</b> | <b><math>k_{obs}</math></b> | <b>uncertainty<sup>b</sup></b> | <b><math>\Delta G_{op}^{\ddagger}</math> <sup>c</sup></b> | <b>uncertainty<sup>c</sup></b> |
|----------------|-----------------------------|--------------------------------|-----------------------------------------------------------|--------------------------------|
| Y3             | 9.13E-05                    | ±1.80E-06                      | 5.59                                                      | ±0.06                          |
| K4             | 6.39E-05                    | ±3.15E-06                      | 5.93                                                      | ±0.10                          |
| A26            | 3.85E-05                    | ±4.50E-06                      | 6.51                                                      | ±0.14                          |
| K28            | 7.42E-05                    | ±4.30E-06                      | 5.59                                                      | ±0.10                          |
| V29            | 4.85E-05                    | ±6.50E-06                      | 5.26                                                      | ±0.15                          |
| K31            | 4.50E-05                    | ±9.00E-06                      | 6.17                                                      | ±0.20                          |
| A34            | 6.97E-05                    | ±7.00E-07                      | 5.93                                                      | ±0.06                          |
| T44            | 6.75E-05                    | ±1.15E-05                      | 5.63                                                      | ±0.18                          |
| D46            | 6.50E-05                    | ±1.50E-05                      | 5.64                                                      | ±0.21                          |
| T51            | 6.65E-05                    | ±1.65E-05                      | 5.97                                                      | ±0.23                          |
| F52            | 6.00E-05                    | ±1.60E-05                      | 5.91                                                      | ±0.24                          |
| T53            | 6.90E-05                    | ±1.21E-05                      | 5.86                                                      | ±0.18                          |

**Table S5.**  $\delta\Delta\Delta G_{\text{op,int}}^{\text{oi}}$  ( $=\Delta\Delta G_{\text{op,mut,cell}}^{\text{oi}} - \Delta\Delta G_{\text{op,mut,buff}}^{\text{oi}}$ , kcal/mol) values for I6L and D40K

GB1. <sup>a</sup>From propagation of error.

| <b>residue</b> | <b><math>\delta\Delta\Delta G_{\text{op,int,I6L}}^{\text{oi}}</math></b> | <b>uncertainty<sup>a</sup></b> | <b><math>\delta\Delta\Delta G_{\text{op,int,D40K}}^{\text{oi}}</math></b> | <b>uncertainty<sup>a</sup></b> |
|----------------|--------------------------------------------------------------------------|--------------------------------|---------------------------------------------------------------------------|--------------------------------|
| Y3             | -1.00                                                                    | ±0.13                          | -1.46                                                                     | ±0.11                          |
| K4             | -0.67                                                                    | ±0.15                          | -                                                                         | -                              |
| A26            | -0.84                                                                    | ±0.19                          | -1.79                                                                     | ±0.17                          |
| K28            | -0.62                                                                    | ±0.12                          | -1.17                                                                     | ±0.06                          |
| V29            | -0.64                                                                    | ±0.16                          | -1.29                                                                     | ±0.07                          |
| K31            | -0.53                                                                    | ±0.23                          | -1.22                                                                     | ±0.13                          |
| A34            | -0.83                                                                    | ±0.10                          | -1.63                                                                     | ±0.12                          |
| T44            | -2.71                                                                    | ±0.21                          | -3.98                                                                     | ±0.20                          |
| D46            | -0.63                                                                    | ±0.24                          | -1.54                                                                     | ±0.16                          |
| T51            | -0.75                                                                    | ±0.26                          | -1.56                                                                     | ±0.14                          |
| F52            | -1.05                                                                    | ±0.29                          | -1.82                                                                     | ±0.21                          |
| T53            | -0.56                                                                    | ±0.25                          | -1.52                                                                     | ±0.18                          |

**Table S6.** Backbone amide proton exchange rates ( $k_{\text{obs}}$ ,  $\text{s}^{-1}$ ) and corresponding  $\Delta G_{\text{op}}^{\circ}$  (kcal/mol) values for D40N GB1 in cells and in buffer (20 mM citrate, 150 mM NaCl pH 5.8, 37 °C). pH is corrected for the isotope effect. For glass electrodes in  $\text{D}_2\text{O}$ ,  $\text{pH} = \text{pH}_{\text{read}} + 0.4$  (2). <sup>a</sup>SDM: standard deviation of the mean from three trials. <sup>b</sup> $\Delta\Delta G_{\text{op,cell,D40N}}^{\circ} = \Delta G_{\text{op,cell,D40N}}^{\circ} - \Delta G_{\text{op,buff,D40N}}^{\circ}$ . <sup>c</sup>From propagation of error.

| residue | $k_{\text{obs,cells}}$ | SDM <sup>a</sup> | $k_{\text{obs,buff}}$ | SDM <sup>a</sup> |  |  |
|---------|------------------------|------------------|-----------------------|------------------|--|--|
| Y3      | 5.23E-04               | ±4.12E-05        | 1.64E-05              | ±1.60E-07        |  |  |
| K4      | 1.17E-03               | ±3.00E-04        | 2.58E-05              | ±2.10E-07        |  |  |
| A26     | 4.76E-04               | ±5.64E-05        | 6.88E-06              | ±4.25E-07        |  |  |
| K28     | 5.25E-04               | ±4.34E-05        | 3.53E-05              | ±2.05E-07        |  |  |
| V29     | 4.31E-04               | ±7.97E-05        | 1.52E-05              | ±8.00E-08        |  |  |
| K31     | 4.87E-04               | ±5.33E-05        | 7.95E-06              | ±4.50E-07        |  |  |
| A34     | 4.91E-04               | ±5.11E-05        | 1.11E-05              | ±2.40E-07        |  |  |
| T44     | 4.05E-04               | ±9.15E-05        | 7.65E-06              | ±1.50E-07        |  |  |
| D46     | 4.27E-04               | ±7.99E-05        | 7.77E-06              | ±1.30E-07        |  |  |
| T51     | 5.30E-04               | ±4.36E-05        | 1.14E-05              | ±1.50E-07        |  |  |
| F52     | 5.35E-04               | ±2.87E-05        | 7.14E-06              | ±5.05E-07        |  |  |
| T53     | 4.84E-04               | ±5.67E-05        | 8.94E-06              | ±3.15E-07        |  |  |

  

| residue | $\Delta G_{\text{op,cell,D40N}}^{\circ}$ | SDM <sup>a</sup> | $\Delta G_{\text{op,buff,D40N}}^{\circ}$ | SDM <sup>a</sup> | $\Delta\Delta G_{\text{op,cell,D40N}}^{\circ}$ <sup>b</sup> | uncertainty <sup>c</sup> |
|---------|------------------------------------------|------------------|------------------------------------------|------------------|-------------------------------------------------------------|--------------------------|
| Y3      | 4.59                                     | ±0.05            | 6.72                                     | ±0.006           | -2.13                                                       | ±0.05                    |
| K4      | 4.25                                     | ±0.19            | 6.55                                     | ±0.005           | -2.30                                                       | ±0.19                    |
| A26     | 5.03                                     | ±0.07            | 7.64                                     | ±0.04            | -2.61                                                       | ±0.08                    |
| K28     | 4.45                                     | ±0.05            | 6.11                                     | ±0.004           | -1.66                                                       | ±0.05                    |
| V29     | 4.00                                     | ±0.11            | 6.05                                     | ±0.003           | -2.04                                                       | ±0.11                    |
| K31     | 4.77                                     | ±0.07            | 7.30                                     | ±0.03            | -2.53                                                       | ±0.08                    |
| A34     | 4.80                                     | ±0.06            | 7.13                                     | ±0.011           | -2.33                                                       | ±0.06                    |
| T44     | 4.62                                     | ±0.13            | 7.04                                     | ±0.01            | -2.42                                                       | ±0.13                    |
| D46     | 4.54                                     | ±0.11            | 6.99                                     | ±0.01            | -2.45                                                       | ±0.11                    |
| T51     | 4.75                                     | ±0.05            | 7.12                                     | ±0.01            | -2.37                                                       | ±0.05                    |
| F52     | 4.62                                     | ±0.03            | 7.28                                     | ±0.04            | -2.66                                                       | ±0.05                    |
| T53     | 4.72                                     | ±0.07            | 7.18                                     | ±0.02            | -2.45                                                       | ±0.08                    |

**Table S7.**  $\Delta\Delta G_{\text{op,mut}}^{\circ}$  ( $\Delta G_{\text{op,D40N}}^{\circ} - \Delta G_{\text{op,wt}}^{\circ}$ , kcal/mol) caused by the D40N mutation in cells and in buffer (20 mM citrate, pH 5.8, 37 °C). pH is corrected for the isotope effect.

For glass electrodes in D<sub>2</sub>O, pH = pH<sub>read</sub> + 0.4 (2). <sup>a</sup>From propagation of error.

| <b>residue</b> | <b><math>\Delta\Delta G_{\text{op,mut,cell}}^{\circ}</math></b> | <b>uncertainty<sup>a</sup></b> | <b><math>\Delta\Delta G_{\text{op,mut,buff}}^{\circ}</math></b> | <b>uncertainty<sup>a</sup></b> |
|----------------|-----------------------------------------------------------------|--------------------------------|-----------------------------------------------------------------|--------------------------------|
| Y3             | -0.79                                                           | ±0.06                          | 0.41                                                            | ±0.10                          |
| K4             | -1.01                                                           | ±0.19                          | 0.10                                                            | ±0.02                          |
| A26            | -0.99                                                           | ±0.09                          | 0.60                                                            | ±0.12                          |
| K28            | -0.74                                                           | ±0.06                          | 0.14                                                            | ±0.04                          |
| V29            | -1.14                                                           | ±0.11                          | 0.05                                                            | ±0.04                          |
| K31            | -1.02                                                           | ±0.10                          | 0.13                                                            | ±0.09                          |
| A34            | -1.11                                                           | ±0.08                          | 0.36                                                            | ±0.06                          |
| T44            | -1.32                                                           | ±0.15                          | 2.44                                                            | ±0.06                          |
| D46            | -1.23                                                           | ±0.15                          | 0.26                                                            | ±0.02                          |
| T51            | -0.91                                                           | ±0.08                          | 0.47                                                            | ±0.10                          |
| F52            | -1.05                                                           | ±0.08                          | 0.55                                                            | ±0.13                          |
| T53            | -0.85                                                           | ±0.10                          | 0.45                                                            | ±0.14                          |



**Table S8.**  $\delta\Delta\Delta G_{\text{op,int}}^{\text{oi}}$  ( $\Delta\Delta G_{\text{op,mut,cell}}^{\text{oi}} - \Delta\Delta G_{\text{op,mut,buffer}}^{\text{oi}}$ , kcal/mol) values for D40N GB1.

<sup>a</sup>From propagation of error.

| <b>residue</b> | <b><math>\delta\Delta\Delta G_{\text{op,int,D40N}}^{\text{oi}}</math></b> | <b>uncertainty<sup>a</sup></b> |
|----------------|---------------------------------------------------------------------------|--------------------------------|
| Y3             | -1.19                                                                     | $\pm 0.11$                     |
| K4             | -1.11                                                                     | $\pm 0.19$                     |
| A26            | -1.59                                                                     | $\pm 0.15$                     |
| K28            | -0.88                                                                     | $\pm 0.08$                     |
| V29            | -1.19                                                                     | $\pm 0.12$                     |
| K31            | -1.15                                                                     | $\pm 0.14$                     |
| A34            | -1.47                                                                     | $\pm 0.10$                     |
| T44            | -3.76                                                                     | $\pm 0.16$                     |
| D46            | -1.49                                                                     | $\pm 0.15$                     |
| T51            | -1.38                                                                     | $\pm 0.13$                     |
| F52            | -1.60                                                                     | $\pm 0.16$                     |
| T53            | -1.30                                                                     | $\pm 0.17$                     |

**Table S9.** Backbone amide proton exchange rates ( $k_{\text{obs}}$ ,  $\text{s}^{-1}$ ) and corresponding  $\Delta G_{\text{op}}^{\circ}$  (kcal/mol) values for D40A GB1 in cells and in buffer (20 mM citrate, 150 mM NaCl pH 5.8, 37 °C). pH is corrected for the isotope effect. For glass electrodes in  $\text{D}_2\text{O}$ ,  $\text{pH} = \text{pH}_{\text{read}} + 0.4$  (2). <sup>a</sup>SDM: standard deviation of the mean from three trials. <sup>b</sup> $\Delta\Delta G_{\text{op,cell,D40A}}^{\circ} = \Delta G_{\text{op,cell,D40A}}^{\circ} - \Delta G_{\text{op,buff,D40A}}^{\circ}$ . <sup>c</sup>From propagation of error.

| <b>residue</b> | <b><math>k_{\text{obs,cells}}</math></b> | <b>SDM<sup>a</sup></b> | <b><math>k_{\text{obs,buff}}</math></b> | <b>SDM<sup>a</sup></b> |  |  |
|----------------|------------------------------------------|------------------------|-----------------------------------------|------------------------|--|--|
| Y3             | 6.04E-04                                 | ±1.15E-04              | 3.71E-05                                | ±6.04E-06              |  |  |
| K4             | 9.65E-04                                 | ±2.63E-04              | 4.10E-05                                | ±4.75E-06              |  |  |
| A26            | 4.67E-04                                 | ±6.70E-05              | 1.48E-05                                | ±2.37E-06              |  |  |
| K28            | 6.09E-04                                 | ±1.03E-04              | 5.84E-05                                | ±9.67E-06              |  |  |
| V29            | 2.81E-04                                 | ±4.91E-05              | 2.64E-05                                | ±4.80E-06              |  |  |
| K31            | 5.22E-04                                 | ±1.96E-04              | 1.74E-05                                | ±3.24E-06              |  |  |
| A34            | 4.89E-04                                 | ±1.21E-04              | 1.95E-05                                | ±1.38E-06              |  |  |
| T44            | 3.23E-04                                 | ±4.81E-05              | 1.15E-05                                | ±1.20E-06              |  |  |
| D46            | 3.30E-04                                 | ±4.03E-05              | 1.36E-05                                | ±1.82E-06              |  |  |
| T51            | 5.72E-04                                 | ±1.08E-04              | 1.97E-05                                | ±2.62E-06              |  |  |
| F52            | 5.14E-04                                 | ±9.10E-05              | 1.61E-05                                | ±2.44E-06              |  |  |
| T53            | 5.37E-04                                 | ±1.03E-04              | 1.91E-05                                | ±2.84E-06              |  |  |

  

| <b>residue</b> | <b><math>\Delta G_{\text{op,cell,D40A}}^{\circ}</math></b> | <b>SDM<sup>a</sup></b> | <b><math>\Delta G_{\text{op,buff,D40A}}^{\circ}</math></b> | <b>SDM<sup>a</sup></b> | <b><math>\Delta\Delta G_{\text{op,cell,D40A}}^{\circ}</math><sup>b</sup></b> | <b>uncertainty<sup>c</sup></b> |
|----------------|------------------------------------------------------------|------------------------|------------------------------------------------------------|------------------------|------------------------------------------------------------------------------|--------------------------------|
| Y3             | 4.52                                                       | ±0.11                  | 6.45                                                       | ±0.02                  | -1.94                                                                        | ±0.12                          |
| K4             | 4.36                                                       | ±0.15                  | 6.49                                                       | ±0.05                  | -2.13                                                                        | ±0.16                          |
| A26            | 5.05                                                       | ±0.09                  | 7.40                                                       | ±0.03                  | -2.35                                                                        | ±0.09                          |
| K28            | 4.37                                                       | ±0.10                  | 6.03                                                       | ±0.02                  | -1.66                                                                        | ±0.10                          |
| V29            | 4.26                                                       | ±0.10                  | 5.95                                                       | ±0.02                  | -1.68                                                                        | ±0.10                          |
| K31            | 4.80                                                       | ±0.22                  | 7.06                                                       | ±0.01                  | -2.26                                                                        | ±0.22                          |
| A34            | 4.83                                                       | ±0.14                  | 7.00                                                       | ±0.08                  | -2.17                                                                        | ±0.16                          |
| T44            | 4.74                                                       | ±0.09                  | 7.00                                                       | ±0.07                  | -2.27                                                                        | ±0.11                          |
| D46            | 4.69                                                       | ±0.07                  | 6.86                                                       | ±0.03                  | -2.17                                                                        | ±0.08                          |
| T51            | 4.72                                                       | ±0.11                  | 7.01                                                       | ±0.04                  | -2.29                                                                        | ±0.12                          |
| F52            | 4.66                                                       | ±0.11                  | 7.01                                                       | ±0.03                  | -2.36                                                                        | ±0.11                          |
| T53            | 4.67                                                       | ±0.11                  | 6.94                                                       | ±0.03                  | -2.27                                                                        | ±0.12                          |

**Table S10.**  $\Delta\Delta G_{\text{op,mut}}^{\circ}$  ( $\Delta G_{\text{op,D40A}}^{\circ} - \Delta G_{\text{op,Wt}}^{\circ}$ , kcal/mol) caused by the D40A mutation in cells and in buffer (20 mM citrate, 150 mM NaCl pH 5.8, 37 °C). pH is corrected for the isotope effect. For glass electrodes in D<sub>2</sub>O, pH = pH<sub>read</sub> + 0.4 (2). <sup>a</sup>From propagation of error.

| <b>residue</b> | $\Delta\Delta G_{\text{op,mut,cell}}^{\circ}$ | <b>uncertainty<sup>a</sup></b> | $\Delta\Delta G_{\text{op,mut,buff}}^{\circ}$ | <b>uncertainty<sup>a</sup></b> |
|----------------|-----------------------------------------------|--------------------------------|-----------------------------------------------|--------------------------------|
| Y3             | -0.86                                         | ±0.12                          | 0.14                                          | ±0.10                          |
| K4             | -0.90                                         | ±0.16                          | 0.04                                          | ±0.06                          |
| A26            | -0.98                                         | ±0.17                          | 0.36                                          | ±0.12                          |
| K28            | -0.82                                         | ±0.10                          | 0.06                                          | ±0.04                          |
| V29            | -0.88                                         | ±0.11                          | -0.05                                         | ±0.04                          |
| K31            | -0.98                                         | ±0.11                          | -0.11                                         | ±0.09                          |
| A34            | -1.08                                         | ±0.23                          | 0.23                                          | ±0.10                          |
| T44            | -1.20                                         | ±0.15                          | 2.41                                          | ±0.09                          |
| D46            | -1.08                                         | ±0.11                          | 0.12                                          | ±0.04                          |
| T51            | -0.94                                         | ±0.13                          | 0.36                                          | ±0.10                          |
| F52            | -1.01                                         | ±0.13                          | 0.29                                          | ±0.13                          |
| T53            | -0.90                                         | ±0.13                          | 0.22                                          | ±0.14                          |

**Table S11.**  $\delta\Delta\Delta G_{\text{op,int}}^{\text{oi}}$  ( $\Delta\Delta G_{\text{op,mut,cell}}^{\text{oi}} - \Delta\Delta G_{\text{op,mut,buff}}^{\text{oi}}$ , kcal/mol) values for D40A GB1.

<sup>a</sup>From propagation of error.

| <b>residue</b> | <b><math>\delta\Delta\Delta G_{\text{op,int,D40}}^{\text{oi}}</math></b> | <b>uncertainty<sup>a</sup></b> |
|----------------|--------------------------------------------------------------------------|--------------------------------|
| Y3             | -1.00                                                                    | $\pm 0.16$                     |
| K4             | -0.94                                                                    | $\pm 0.17$                     |
| A26            | -1.34                                                                    | $\pm 0.16$                     |
| K28            | -0.88                                                                    | $\pm 0.11$                     |
| V29            | -0.83                                                                    | $\pm 0.11$                     |
| K31            | -0.88                                                                    | $\pm 0.24$                     |
| A34            | -1.31                                                                    | $\pm 0.18$                     |
| T44            | -3.61                                                                    | $\pm 0.15$                     |
| D46            | -1.20                                                                    | $\pm 0.14$                     |
| T51            | -1.30                                                                    | $\pm 0.16$                     |
| F52            | -1.30                                                                    | $\pm 0.18$                     |
| T53            | -1.12                                                                    | $\pm 0.19$                     |

**Fig. S1.** Expanded thermodynamic cycle from Fig. 1, depicting equilibria between native (N) and denatured (D) states of wt GB1 and its variants. Intracellular interactions (red) cause deviations in values of  $\Delta\Delta G_{mut,cell}^{\circ}$  and  $\Delta\Delta G_{mut,buff}^{\circ}$ .

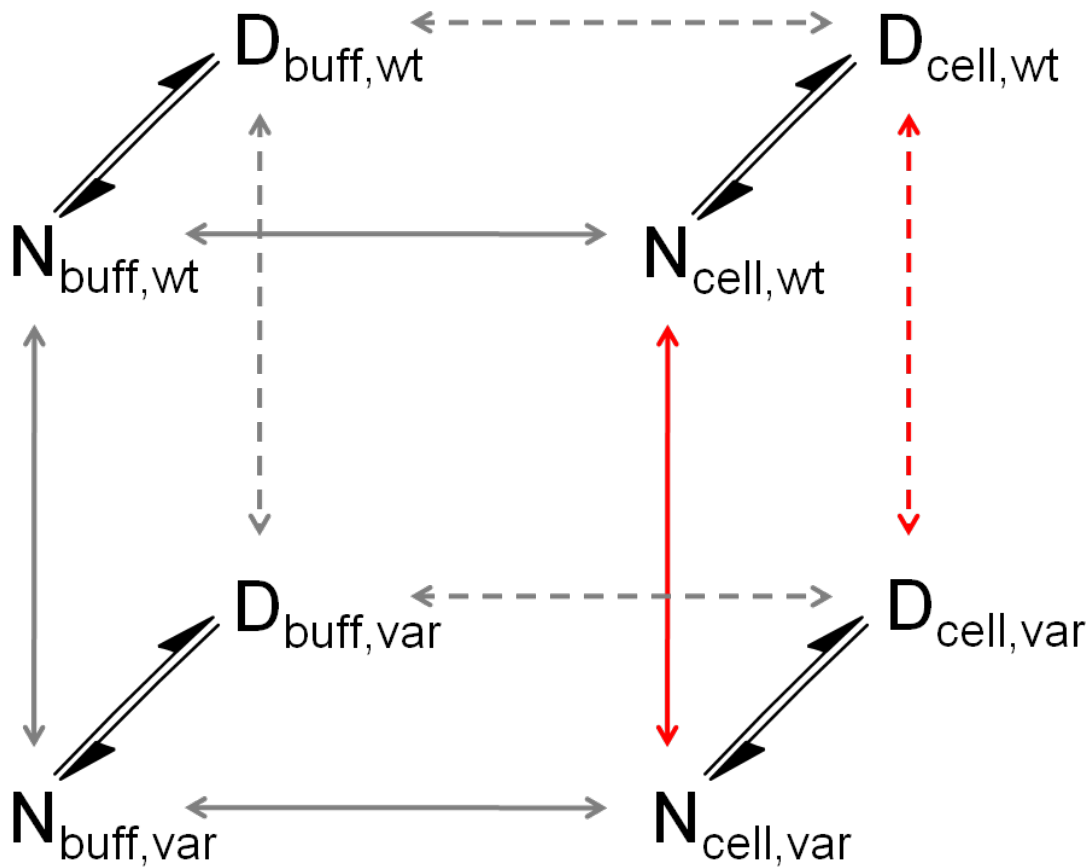

**Fig. S2 Cytoplasmic pH. A)** pH dependence of the K10 amide proton shift relative to that of the pH-insensitive amide proton of W43 (10.507 ppm). pH is corrected for the isotope effect. For glass electrodes in D<sub>2</sub>O, pH = pH<sub>read</sub> + 0.4 (2). The inset shows the entire titration curve constructed from GB1-expressing lysates in 50 mM citrate, 50 mM bis-tris propane, 50 mM HEPES, 50 mM borate, 5% D<sub>2</sub>O, 0.1% DSS, 298 K. The curve is from a fit to the Henderson-Hasselbach equation,  $\delta = \delta_{low} - \frac{\delta_{low} - \delta_{high}}{1 + 10^{n(pK_a - pH)}}$ , where  $\delta_{low}$  and  $\delta_{high}$  are the low and high pH shift plateaus and n is the number of protons. The derived pK<sub>a</sub>, 4.0, which probably reflects that of E56 to which the backbone amide forms a hydrogen bond, is consistent with literature values (3). In-cell spectra were acquired as a function of time and shift changes overlaid onto the curve. **B)** Time dependence of the external (glass electrode) and internal (from data in A) pH. The dashed horizontal line represents the pH used to derive the intrinsic rates. The curve is of no theoretical significance.

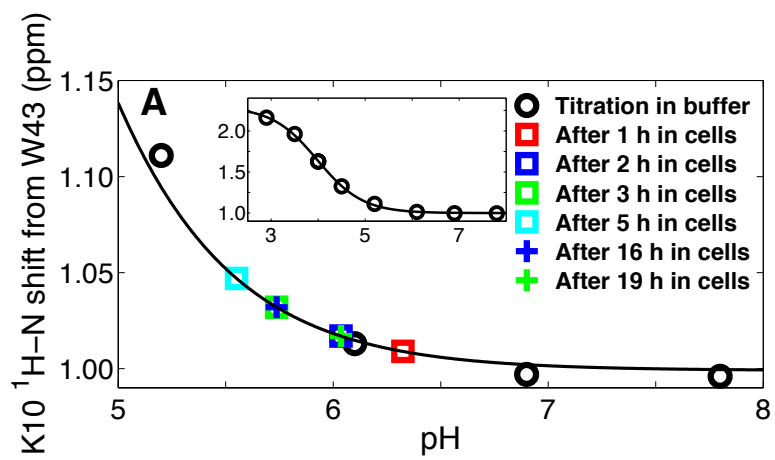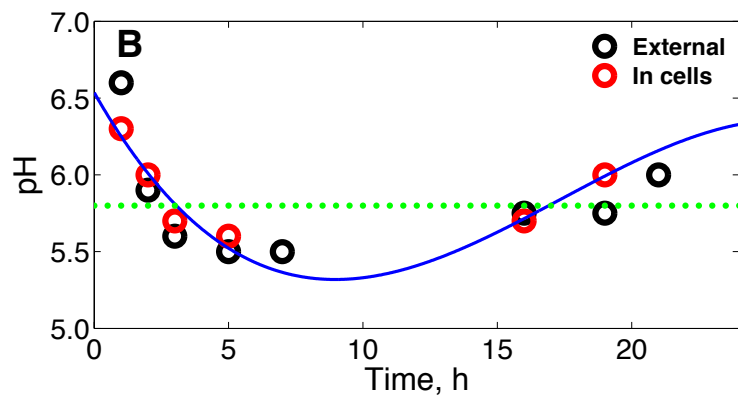

S1

## References

1. W. B. Monteith, G. J. Pielak, Residue level quantification of protein stability in living cells. *Proc. Natl. Acad. Sci. USA* **111**, 11335-11340 (2014).
2. P. K. Glasoe, F. A. Long, Use of glass electrodes to measure acidities in deuterium oxide. *J Phys. Chem.* **64**, 188-190 (1960).
3. D. Khare, P. Alexander, J. Antosiewicz, P. Bryan, M. Gilson, J. Orban, pKa Measurements from nuclear magnetic resonance for the B1 and B2 immunoglobulin G-binding domains of protein G: comparison with calculated values for nuclear magnetic resonance and X-ray structures. *Biochemistry* **36**, 3580-3589 (1997).
